# Supplementary material for: Evaluation of sterile glove usage on digital tactile sensitivity using the Grating Orientation Task
Source: Front Vet Sci. 2024 Jun 19;11:1401130. doi: 10.3389/fvets.2024.1401130 (PMC11220246; doi:10.3389/fvets.2024.1401130)
Supplement: Supplementary file 1 [file Table_1.XLSX]

## Sheet: Information
	Age	Hand dominance	Date of test	Glove size	Style needed	Specific Order	None	Single	Double	Micro	Ortho
1	34	R	2018-05-10	6.5	123	SDMO	1.5	2	2	2.5	2.5
2	25	R	2018-05-11	7	321	OMSD	2	2	2	2	2.5
3	25	R	2018-05-11	6.5	123	SDMO	1.5	2	2.5	2	2.5
4	25	R	2018-05-11	7	321	OMSD	2	2	2	1.5	2
5	27	R	2018-05-11	6	231	MOSD	1.5	1.5	2.5	2	2
6	25	L	2018-05-11	6	123	SDMO	2	2.5	2.5	3	2.5
7	25	R	2018-05-11	7.5	321	OMSD	2	2.5	2.5	2	3
8	26	R	2018-05-16	7	123	SDMO	2.5	2.5	3	2.5	2.5
9	27	R	2018-05-16	7	213	MSDO	1.2	2	2.5	2	2.5
10	24	R	2018-05-16	6.5	213	MSDO	3	2.5	3.5	3.5	3
11	29	R	2018-05-16	6.5	231	MOSD	3	3	3.5	3	3.5
12	26	L	2018-05-17	6	312	OSDM	2	2	2.5	1.5	3
13	25	R	2018-05-17	6.5	132	SDOM	2.5	3	3	3	2.5
14	30	R	2018-05-18	6	213	MSDO	2.5	3	3	3.5	3
15	32	R	2018-05-18	6.5	213	MSDO	3	3	3	3.5	3
16	25	R	2018-05-22	6	321	OMSD	3.5	3	3.5	3.5	4
17	25	R	2018-05-22	6.5	312	OSDM	2.5	3	3	3	3.5
18	25	R	2018-05-26	6.5	231	MOSD	2.5	2	3	2.5	3
19	24	R	2018-05-26	7	132	SDOM	2	2.5	3	2.5	3
20	25	R	2018-05-26	7	123	SDMO	2.5	3	3	3	3
21	28	R	2018-06-02	7	231	MOSD	2.5	2.5	2.5	2.5	2.5
22	25	R	2018-06-02	6	312	OSDM	1.5	2.5	3	2	2.5
23	26	R	2018-06-02	6	123	SDMO	2.5	2.5	3	2	3
24	25	R	2018-06-03	6	132	SDOM	1.5	2.5	2.5	3	3.5
25	24	R	2018-06-15	6	123	SDMO	1.2	2	2.5	3	2.5
26	25	R	2018-06-15	6	312	OSDM	2	2.5	3	2.5	3
27	26	R	2018-06-15	7.5	213	MSDO	2.5	2.5	3	3	3
28	24	R	2018-06-15	6.5	321	OMSD	3	3.5	3.5	2.5	3
29	25	R	2018-06-22	8	312	OSDM	2.5	2.5	2.5	2.5	2.5
30	25	R	2018-06-22	8	213	MSDO	2	3	3.5	2.5	3.5
31	26	R	2018-06-22	6.5	231	MOSD	2	2	2	2	2.5
32	24	R	2018-06-22	6.5	312	OSDM	2.5	3	2.5	2.5	3
33	25	L	2018-07-03	6.5	321	OMSD	2.5	3	3.5	2.5	3
34	26	R	2018-07-03	6.5	123	SDMO	1.5	2	1.5	1.5	2
35	25	R	2018-07-03	6.5	321	OMSD	2	2.5	3	2.5	3
36	26	R	2018-07-11	7	123	SDMO	2.5	2.5	2.5	2	2.5
37	27	R	2018-07-11	6.5	132	SDOM	2.5	3	3	2.5	3
38	25	R	2018-07-11	6	321	OMSD	2	2.5	2.5	2.5	2.5
39	24	R	2018-07-18	7	312	OSDM	2.5	2	2	2	2.5
40	25	R	2018-07-18	7.5	213	MSDO	2	2.5	2.5	1.5	2.5
41	25	R	2018-07-18	6.5	321	OMSD	3	3	3	3.5	3.5
42	25	L	2018-07-18	7	231	MOSD	1.5	2	2.5	2	2.5
43	25	R	2018-08-08	7	312	OSDM	2	3	2.5	2	3
44	27	R	2018-08-08	7	312	OSDM	1.5	2.5	2.5	2	2.5
45	27	R	2018-08-08	7.5	231	MOSD	1.5	2	3	2.5	3
46	25	L	2018-08-31	6.5	231	MOSD	2.5	2.5	2.5	2	2.5
47	27	R	2018-08-31	7	123	SDMO	2	2.5	3	3	3
48	28	R	2018-08-31	7.5	213	MSDO	3	3.5	3.5	3	3
49	25	R	2018-08-31	6.5	321	OMSD	2	2.5	3	2.5	3
50	28	R	2018-10-04	6.5	321	OMSD	2	2.5	2.5	2.5	3
51	26	R	2018-10-04	7	312	OSDM	1.2	2.5	2	1.5	2
52	24	L	2018-10-04	7.5	321	OMSD	2.5	3	3	3	3
53	25	R	2018-10-04	7	213	MSDO	2	2	2.5	1.5	2.5
54	25	R	2018-10-04	7	132	SDOM	1.5	2.5	2.5	2.5	2
55	25	R	2019-10-15	6.5	231	MOSD	2.5	2	2	2	2.5
56	27	R	2019-10-15	6.5	312	OSDM	2	2.5	2.5	1.5	2.5
57	26	L	2019-10-15	6	213	MSDO	3	3	3	3.5	3.5
58	25	R	2019-10-15	7	231	MOSD	2	2	2.5	2.5	2.5
59	25	R	2019-10-15	7	321	OMSD	2	3	2.5	2	3
60	25	R	2019-10-15	7.5	312	OSDM	1.5	2.5	2.5	2	2.5
61
62	25.83	L=7, R=53		6.7		Mean	2.16	2.52	2.71	2.43	2.78
63	1.84			0.52		SD	0.53	0.43	0.45	0.58	0.43
64				7.5
65				7			Min	Mean	Mean	Max
66						N	1.63	2.16	2.16	2.69
67						S	2.09	2.52	2.52	2.95
68						D	2.26	2.71	2.71	3.16
69						M	1.85	2.43	2.43	3.01
70						O	2.35	2.78	2.78	3.21
71
72								S:N 16.7%	D:N 25.4%	M:N 11.7%	O:N 28.7%
73
74
75
76
77
78
79
80
81
82
83
84
85
86
87
88
89
90
91
92
93
94
95
96
97
98
99
100
	57	L	2018-05-18	7.5	321		4.5	NA	NA	NA	NA

## Sheet: DataOrganized
Glove type	Dome size	Student #/index	Age	Glove size	Handedness	Correct #
n	1.2	1	34	6.5	R	7
n	1.5	1	34	6.5	R	9
n	2	1	34	6.5	R	9
s	1.5	1	34	6.5	R	7
s	2	1	34	6.5	R	9
s	2.5	1	34	6.5	R	10
d	1.5	1	34	6.5	R	7
d	2	1	34	6.5	R	8
d	2.5	1	34	6.5	R	10
m	1.5	1	34	6.5	R	7
m	2	1	34	6.5	R	7
m	2.5	1	34	6.5	R	10
o	1.5	1	34	6.5	R	6
o	2	1	34	6.5	R	7
o	2.5	1	34	6.5	R	9
n	1.5	2	25	7	R	6
n	2	2	25	7	R	10
s	1.5	2	25	7	R	7
s	2	2	25	7	R	9
d	1.5	2	25	7	R	6
d	2	2	25	7	R	9
m	1.5	2	25	7	R	7
m	2	2	25	7	R	10
o	1.5	2	25	7	R	6
o	2	2	25	7	R	6
o	2.5	2	25	7	R	9
n	1.2	3	25	6.5	R	7
n	1.5	3	25	6.5	R	8
n	2	3	25	6.5	R	9
s	1.5	3	25	6.5	R	6
s	2	3	25	6.5	R	9
d	1.5	3	25	6.5	R	4
d	2	3	25	6.5	R	6
d	2.5	3	25	6.5	R	9
m	1.5	3	25	6.5	R	6
m	2	3	25	6.5	R	10
o	1.5	3	25	6.5	R	6
o	2	3	25	6.5	R	6
o	2.5	3	25	6.5	R	9
n	1.5	4	25	7	R	6
n	2	4	25	7	R	9
s	1.5	4	25	7	R	7
s	2	4	25	7	R	9
d	1.5	4	25	7	R	7
d	2	4	25	7	R	8
d	2.5	4	25	7	R	9
m	1.5	4	25	7	R	7
m	2	4	25	7	R	9
o	1.5	4	25	7	R	7
o	2	4	25	7	R	8
o	2.5	4	25	7	R	9
n	1	5	27	6	R	4
n	1.2	5	27	6	R	7
n	1.5	5	27	6	R	9
s	1.2	5	27	6	R	6
s	1.5	5	27	6	R	8
s	2	5	27	6	R	8
d	1.5	5	27	6	R	6
d	2	5	27	6	R	6
d	2.5	5	27	6	R	9
m	1.5	5	27	6	R	7
m	2	5	27	6	R	9
o	1.5	5	27	6	R	6
o	2	5	27	6	R	8
o	2.5	5	27	6	R	9
n	1.5	6	25	6	L	6
n	2	6	25	6	L	9
s	1.5	6	25	6	L	3
s	2	6	25	6	L	6
s	2.5	6	25	6	L	8
d	1.5	6	25	6	L	5
d	2	6	25	6	L	7
d	2.5	6	25	6	L	9
d	3	6	25	6	L	9
m	1.5	6	25	6	L	6
m	2	6	25	6	L	7
m	2.5	6	25	6	L	7
m	3	6	25	6	L	9
o	1.5	6	25	6	L	5
o	2	6	25	6	L	6
o	2.5	6	25	6	L	8
o	3	6	25	6	L	9
n	1.5	7	25	7.5	R	7
n	2	7	25	7.5	R	9
s	1.5	7	25	7.5	R	5
s	2	7	25	7.5	R	7
s	2.5	7	25	7.5	R	9
d	1.5	7	25	7.5	R	7
d	2	7	25	7.5	R	7
d	2.5	7	25	7.5	R	8
m	1.5	7	25	7.5	R	6
m	2	7	25	7.5	R	8
o	1.5	7	25	7.5	R	4
o	2	7	25	7.5	R	6
o	2.5	7	25	7.5	R	7
o	3	7	25	7.5	R	9
n	1.5	8	26	7	R	6
n	2	8	26	7	R	7
n	2.5	8	26	7	R	9
s	1.5	8	26	7	R	4
s	2	8	26	7	R	6
s	2.5	8	26	7	R	10
d	1.5	8	26	7	R	5
d	2	8	26	7	R	5
d	2.5	8	26	7	R	7
d	3	8	26	7	R	10
m	1.5	8	26	7	R	6
m	2	8	26	7	R	6
m	2.5	8	26	7	R	8
m	3	8	26	7	R	9
o	1.5	8	26	7	R	4
o	2	8	26	7	R	7
o	2.5	8	26	7	R	9
n	1	9	27	7	R	7
n	1.2	9	27	7	R	9
n	1.5	9	27	7	R	9
n	2	9	27	7	R	10
s	1.2	9	27	7	R	6
s	1.5	9	27	7	R	6
s	2	9	27	7	R	8
d	1.5	9	27	7	R	7
d	2	9	27	7	R	7
d	2.5	9	27	7	R	8
m	1.2	9	27	7	R	5
m	1.5	9	27	7	R	7
m	2	9	27	7	R	10
o	1.5	9	27	7	R	6
o	2	9	27	7	R	7
o	2.5	9	27	7	R	8
n	1.5	10	24	6.5	R	6
n	2	10	24	6.5	R	7
n	2.5	10	24	6.5	R	7
n	3	10	24	6.5	R	9
s	1.5	10	24	6.5	R	5
s	2	10	24	6.5	R	6
s	2.5	10	24	6.5	R	8
s	3	10	24	6.5	R	9
d	1.5	10	24	6.5	R	5
d	2	10	24	6.5	R	5
d	2.5	10	24	6.5	R	7
d	3	10	24	6.5	R	7
d	3.5	10	24	6.5	R	10
m	1.5	10	24	6.5	R	5
m	2	10	24	6.5	R	6
m	2.5	10	24	6.5	R	7
m	3	10	24	6.5	R	7
m	3.5	10	24	6.5	R	8
o	1.5	10	24	6.5	R	3
o	2	10	24	6.5	R	6
o	2.5	10	24	6.5	R	7
o	3	10	24	6.5	R	8
o	3.5	10	24	6.5	R	9
n	1.5	11	29	6.5	R	5
n	2	11	29	6.5	R	6
n	2.5	11	29	6.5	R	6
n	3	11	29	6.5	R	9
s	1.5	11	29	6.5	R	5
s	2	11	29	6.5	R	5
s	2.5	11	29	6.5	R	7
s	3	11	29	6.5	R	9
d	1.5	11	29	6.5	R	5
d	2	11	29	6.5	R	3
d	2.5	11	29	6.5	R	6
d	3	11	29	6.5	R	7
d	3.5	11	29	6.5	R	9
m	1.5	11	29	6.5	R	4
m	2	11	29	6.5	R	5
m	2.5	11	29	6.5	R	7
m	3	11	29	6.5	R	9
m	3.5	11	29	6.5	R	9
o	1.5	11	29	6.5	R	4
o	2	11	29	6.5	R	6
o	2.5	11	29	6.5	R	7
o	3	11	29	6.5	R	7
o	3.5	11	29	6.5	R	9
n	1.2	12	26	6	L	6
n	1.5	12	26	6	L	7
n	2	12	26	6	L	10
s	1.5	12	26	6	L	6
s	2	12	26	6	L	9
s	2.5	12	26	6	L	10
d	1.5	12	26	6	L	4
d	2	12	26	6	L	5
d	2.5	12	26	6	L	8
d	3	12	26	6	L	9
m	1.2	12	26	6	L	6
m	1.5	12	26	6	L	8
m	2	12	26	6	L	9
o	1.5	12	26	6	L	5
o	2	12	26	6	L	6
o	2.5	12	26	6	L	6
o	3	12	26	6	L	9
n	1.5	13	25	6.5	R	5
n	2	13	25	6.5	R	6
n	2.5	13	25	6.5	R	9
s	1.5	13	25	6.5	R	4
s	2	13	25	6.5	R	6
s	2.5	13	25	6.5	R	7
s	3	13	25	6.5	R	9
d	1.5	13	25	6.5	R	4
d	2	13	25	6.5	R	6
d	2.5	13	25	6.5	R	7
d	3	13	25	6.5	R	9
m	1.5	13	25	6.5	R	4
m	2	13	25	6.5	R	4
m	2.5	13	25	6.5	R	7
m	3	13	25	6.5	R	9
o	1.5	13	25	6.5	R	5
o	2	13	25	6.5	R	5
o	2.5	13	25	6.5	R	9
o	3	13	25	6.5	R	10
n	1.5	14	30	6	R	6
n	2	14	30	6	R	7
n	2.5	14	30	6	R	9
s	1.5	14	30	6	R	5
s	2	14	30	6	R	5
s	2.5	14	30	6	R	7
s	3	14	30	6	R	9
d	1.5	14	30	6	R	2
d	2	14	30	6	R	5
d	2.5	14	30	6	R	7
d	3	14	30	6	R	8
d	3.5	14	30	6	R	10
m	1.5	14	30	6	R	3
m	2	14	30	6	R	5
m	2.5	14	30	6	R	7
m	3	14	30	6	R	7
m	3.5	14	30	6	R	10
o	1.5	14	30	6	R	5
o	2	14	30	6	R	5
o	2.5	14	30	6	R	6
o	3	14	30	6	R	10
n	1.5	15	32	6.5	R	6
n	2	15	32	6.5	R	6
n	2.5	15	32	6.5	R	6
n	3	15	32	6.5	R	10
s	1.5	15	32	6.5	R	3
s	2	15	32	6.5	R	6
s	2.5	15	32	6.5	R	7
s	3	15	32	6.5	R	9
d	1.5	15	32	6.5	R	3
d	2	15	32	6.5	R	6
d	2.5	15	32	6.5	R	7
d	3	15	32	6.5	R	9
m	1.5	15	32	6.5	R	6
m	2	15	32	6.5	R	5
m	2.5	15	32	6.5	R	6
m	3	15	32	6.5	R	7
m	3.5	15	32	6.5	R	10
o	1.5	15	32	6.5	R	6
o	2	15	32	6.5	R	6
o	2.5	15	32	6.5	R	7
o	3	15	32	6.5	R	10
n	1.5	16	25	6	R	5
n	2	16	25	6	R	5
n	2.5	16	25	6	R	7
n	3	16	25	6	R	7
n	3.5	16	25	6	R	9
s	1.5	16	25	6	R	4
s	2	16	25	6	R	3
s	2.5	16	25	6	R	6
s	3	16	25	6	R	9
s	3.5	16	25	6	R	10
d	1.5	16	25	6	R	1
d	2	16	25	6	R	4
d	2.5	16	25	6	R	6
d	3	16	25	6	R	7
d	3.5	16	25	6	R	10
m	1.5	16	25	6	R	4
m	2	16	25	6	R	3
m	2.5	16	25	6	R	6
m	3	16	25	6	R	7
m	3.5	16	25	6	R	10
o	1.5	16	25	6	R	5
o	2	16	25	6	R	4
o	2.5	16	25	6	R	5
o	3	16	25	6	R	7
o	3.5	16	25	6	R	7
o	4	16	25	6	R	10
n	1.5	17	25	6.5	R	5
n	2	17	25	6.5	R	6
n	2.5	17	25	6.5	R	9
s	1.5	17	25	6.5	R	5
s	2	17	25	6.5	R	4
s	2.5	17	25	6.5	R	7
s	3	17	25	6.5	R	9
d	1.5	17	25	6.5	R	3
d	2	17	25	6.5	R	2
d	2.5	17	25	6.5	R	4
d	3	17	25	6.5	R	9
m	1.5	17	25	6.5	R	3
m	2	17	25	6.5	R	4
m	2.5	17	25	6.5	R	6
m	3	17	25	6.5	R	10
o	1.5	17	25	6.5	R	7
o	2	17	25	6.5	R	4
o	2.5	17	25	6.5	R	7
o	3	17	25	6.5	R	7
o	3.5	17	25	6.5	R	10
n	1.5	18	25	6.5	R	6
n	2	18	25	6.5	R	6
n	2.5	18	25	6.5	R	8
s	1.5	18	25	6.5	R	6
s	2	18	25	6.5	R	8
s	2.5	18	25	6.5	R	8
d	1.5	18	25	6.5	R	3
d	2	18	25	6.5	R	5
d	2.5	18	25	6.5	R	6
d	3	18	25	6.5	R	8
m	1.5	18	25	6.5	R	6
m	2	18	25	6.5	R	7
m	2.5	18	25	6.5	R	9
o	1.5	18	25	6.5	R	5
o	2	18	25	6.5	R	7
o	2.5	18	25	6.5	R	7
o	3	18	25	6.5	R	9
n	1.5	19	24	7	R	7
n	2	19	24	7	R	8
n	2.5	19	24	7	R	9
s	1.5	19	24	7	R	3
s	2	19	24	7	R	7
s	2.5	19	24	7	R	10
d	1.5	19	24	7	R	4
d	2	19	24	7	R	5
d	2.5	19	24	7	R	7
d	3	19	24	7	R	9
m	1.5	19	24	7	R	4
m	2	19	24	7	R	7
m	2.5	19	24	7	R	9
o	1.5	19	24	7	R	4
o	2	19	24	7	R	6
o	2.5	19	24	7	R	7
o	3	19	24	7	R	9
n	1.5	20	25	7	R	5
n	2	20	25	7	R	7
n	2.5	20	25	7	R	9
s	1.5	20	25	7	R	5
s	2	20	25	7	R	6
s	2.5	20	25	7	R	7
s	3	20	25	7	R	8
d	1.5	20	25	7	R	3
d	2	20	25	7	R	6
d	2.5	20	25	7	R	6
d	3	20	25	7	R	9
m	1.5	20	25	7	R	6
m	2	20	25	7	R	5
m	2.5	20	25	7	R	6
m	3	20	25	7	R	10
o	1.5	20	25	7	R	6
o	2	20	25	7	R	6
o	2.5	20	25	7	R	7
o	3	20	25	7	R	9
n	1.5	21	28	7	R	6
n	2	21	28	7	R	7
n	2.5	21	28	7	R	9
s	1.5	21	28	7	R	5
s	2	21	28	7	R	5
s	2.5	21	28	7	R	9
d	1.5	21	28	7	R	5
d	2	21	28	7	R	7
d	2.5	21	28	7	R	9
m	1.5	21	28	7	R	5
m	2	21	28	7	R	5
m	2.5	21	28	7	R	10
o	1.5	21	28	7	R	6
o	2	21	28	7	R	6
o	2.5	21	28	7	R	9
n	1	22	25	6	R	4
n	1.2	22	25	6	R	6
n	1.5	22	25	6	R	9
s	1.5	22	25	6	R	5
s	2	22	25	6	R	7
s	2.5	22	25	6	R	9
d	1.5	22	25	6	R	4
d	2	22	25	6	R	7
d	2.5	22	25	6	R	7
d	3	22	25	6	R	10
m	1.5	22	25	6	R	5
m	2	22	25	6	R	9
o	1.5	22	25	6	R	7
o	2	22	25	6	R	6
o	2.5	22	25	6	R	9
n	1.5	23	26	6	R	5
n	2	23	26	6	R	7
n	2.5	23	26	6	R	9
s	1.5	23	26	6	R	4
s	2	23	26	6	R	6
s	2.5	23	26	6	R	10
d	1.5	23	26	6	R	4
d	2	23	26	6	R	6
d	2.5	23	26	6	R	7
d	3	23	26	6	R	10
m	1.5	23	26	6	R	5
m	2	23	26	6	R	8
m	2.5	23	26	6	R	9
o	1.5	23	26	6	R	5
o	2	23	26	6	R	6
o	2.5	23	26	6	R	7
o	3	23	26	6	R	9
n	1	24	25	6	R	6
n	1.2	24	25	6	R	7
n	1.5	24	25	6	R	9
s	1.5	24	25	6	R	6
s	2	24	25	6	R	6
s	2.5	24	25	6	R	9
d	1.5	24	25	6	R	3
d	2	24	25	6	R	6
d	2.5	24	25	6	R	9
m	1.5	24	25	6	R	3
m	2	24	25	6	R	6
m	2.5	24	25	6	R	7
m	3	24	25	6	R	10
o	1.5	24	25	6	R	4
o	2	24	25	6	R	6
o	2.5	24	25	6	R	6
o	3	24	25	6	R	7
o	3.5	24	25	6	R	9
n	1	25	24	6	R	5
n	1.2	25	24	6	R	9
n	1.5	25	24	6	R	9
s	1.5	25	24	6	R	6
s	2	25	24	6	R	9
d	1.5	25	24	6	R	6
d	2	25	24	6	R	6
d	2.5	25	24	6	R	10
m	1.5	25	24	6	R	4
m	2	25	24	6	R	6
m	2.5	25	24	6	R	6
m	3	25	24	6	R	10
o	1.5	25	24	6	R	3
o	2	25	24	6	R	6
o	2.5	25	24	6	R	9
n	1.2	26	25	6	R	6
n	1.5	26	25	6	R	6
n	2	26	25	6	R	9
n	2.5	26	25	6	R	9
s	1.5	26	25	6	R	5
s	2	26	25	6	R	6
s	2.5	26	25	6	R	9
d	1.5	26	25	6	R	6
d	2	26	25	6	R	6
d	2.5	26	25	6	R	7
d	3	26	25	6	R	9
m	1.5	26	25	6	R	6
m	2	26	25	6	R	7
m	2.5	26	25	6	R	10
o	1.5	26	25	6	R	4
o	2	26	25	6	R	4
o	2.5	26	25	6	R	7
o	3	26	25	6	R	9
n	1.5	27	26	7.5	R	5
n	2	27	26	7.5	R	7
n	2.5	27	26	7.5	R	9
s	1.5	27	26	7.5	R	4
s	2	27	26	7.5	R	6
s	2.5	27	26	7.5	R	10
d	1.5	27	26	7.5	R	6
d	2	27	26	7.5	R	6
d	2.5	27	26	7.5	R	6
d	3	27	26	7.5	R	10
m	1.5	27	26	7.5	R	4
m	2	27	26	7.5	R	5
m	2.5	27	26	7.5	R	5
m	3	27	26	7.5	R	9
o	1.5	27	26	7.5	R	3
o	2	27	26	7.5	R	3
o	2.5	27	26	7.5	R	5
o	3	27	26	7.5	R	10
n	1.5	28	24	6.5	R	4
n	2	28	24	6.5	R	5
n	2.5	28	24	6.5	R	7
n	3	28	24	6.5	R	9
s	1.5	28	24	6.5	R	2
s	2	28	24	6.5	R	7
s	2.5	28	24	6.5	R	6
s	3	28	24	6.5	R	7
s	3.5	28	24	6.5	R	9
d	1.5	28	24	6.5	R	5
d	2	28	24	6.5	R	4
d	2.5	28	24	6.5	R	6
d	3	28	24	6.5	R	7
d	3.5	28	24	6.5	R	9
m	1.5	28	24	6.5	R	6
m	2	28	24	6.5	R	7
m	2.5	28	24	6.5	R	10
o	1.5	28	24	6.5	R	5
o	2	28	24	6.5	R	6
o	2.5	28	24	6.5	R	7
o	3	28	24	6.5	R	9
n	1.5	29	25	8	R	5
n	2	29	25	8	R	6
n	2.5	29	25	8	R	9
s	1.5	29	25	8	R	3
s	2	29	25	8	R	6
s	2.5	29	25	8	R	9
d	1.5	29	25	8	R	5
d	2	29	25	8	R	7
d	2.5	29	25	8	R	9
m	1.5	29	25	8	R	4
m	2	29	25	8	R	6
m	2.5	29	25	8	R	9
o	1.5	29	25	8	R	4
o	2	29	25	8	R	6
o	2.5	29	25	8	R	9
n	1.5	30	25	8	R	6
n	2	30	25	8	R	9
s	1.5	30	25	8	R	4
s	2	30	25	8	R	6
s	2.5	30	25	8	R	7
s	3	30	25	8	R	9
d	1.5	30	25	8	R	3
d	2	30	25	8	R	3
d	2.5	30	25	8	R	5
d	3	30	25	8	R	5
d	3.5	30	25	8	R	8
m	1.5	30	25	8	R	5
m	2	30	25	8	R	6
m	2.5	30	25	8	R	8
o	1.5	30	25	8	R	2
o	2	30	25	8	R	3
o	2.5	30	25	8	R	4
o	3	30	25	8	R	4
o	3.5	30	25	8	R	9
n	1.5	31	26	6.5	R	5
n	2	31	26	6.5	R	9
s	1.5	31	26	6.5	R	5
s	2	31	26	6.5	R	10
d	1.5	31	26	6.5	R	4
d	2	31	26	6.5	R	9
m	1.5	31	26	6.5	R	6
m	2	31	26	6.5	R	9
o	1.5	31	26	6.5	R	5
o	2	31	26	6.5	R	6
o	2.5	31	26	6.5	R	9
n	1.5	32	24	6.5	R	6
n	2	32	24	6.5	R	6
n	2.5	32	24	6.5	R	10
s	1.5	32	24	6.5	R	5
s	2	32	24	6.5	R	5
s	2.5	32	24	6.5	R	7
s	3	32	24	6.5	R	10
d	1.5	32	24	6.5	R	4
d	2	32	24	6.5	R	6
d	2.5	32	24	6.5	R	9
m	1.5	32	24	6.5	R	4
m	2	32	24	6.5	R	6
m	2.5	32	24	6.5	R	10
o	1.5	32	24	6.5	R	4
o	2	32	24	6.5	R	4
o	2.5	32	24	6.5	R	7
o	3	32	24	6.5	R	10
n	1.5	33	25	6.5	L	6
n	2	33	25	6.5	L	6
n	2.5	33	25	6.5	L	9
s	1.5	33	25	6.5	L	3
s	2	33	25	6.5	L	5
s	2.5	33	25	6.5	L	6
s	3	33	25	6.5	L	9
d	1.5	33	25	6.5	L	3
d	2	33	25	6.5	L	4
d	2.5	33	25	6.5	L	3
d	3	33	25	6.5	L	6
d	3.5	33	25	6.5	L	8
m	1.5	33	25	6.5	L	6
m	2	33	25	6.5	L	5
m	2.5	33	25	6.5	L	8
o	1.5	33	25	6.5	L	5
o	2	33	25	6.5	L	5
o	2.5	33	25	6.5	L	7
o	3	33	25	6.5	L	9
n	1.2	34	26	6.5	R	6
n	1.5	34	26	6.5	R	9
n	2	34	26	6.5	R	9
s	1.5	34	26	6.5	R	5
s	2	34	26	6.5	R	9
d	1.2	34	26	6.5	R	5
d	1.5	34	26	6.5	R	9
d	2	34	26	6.5	R	9
m	1.2	34	26	6.5	R	5
m	1.5	34	26	6.5	R	8
o	2	34	26	6.5	R	9
o	1.5	34	26	6.5	R	7
o	2	34	26	6.5	R	9
n	1.5	35	25	6.5	R	5
n	2	35	25	6.5	R	9
s	1.5	35	25	6.5	R	3
s	2	35	25	6.5	R	4
s	2.5	35	25	6.5	R	9
d	1.5	35	25	6.5	R	4
d	2	35	25	6.5	R	4
d	2.5	35	25	6.5	R	6
d	3	35	25	6.5	R	9
m	1.5	35	25	6.5	R	4
m	2	35	25	6.5	R	5
m	2.5	35	25	6.5	R	10
o	1.5	35	25	6.5	R	5
o	2	35	25	6.5	R	4
o	2.5	35	25	6.5	R	5
o	3	35	25	6.5	R	8
n	1.5	36	26	7	R	4
n	2	36	26	7	R	6
n	2.5	36	26	7	R	10
s	1.5	36	26	7	R	2
s	2	36	26	7	R	4
s	2.5	36	26	7	R	10
d	1.5	36	26	7	R	3
d	2	36	26	7	R	4
d	2.5	36	26	7	R	9
m	1.5	36	26	7	R	5
m	2	36	26	7	R	9
m	2.5	36	26	7	R	10
o	1.5	36	26	7	R	5
o	2	36	26	7	R	5
o	2.5	36	26	7	R	9
n	1.5	37	27	6.5	R	2
n	2	37	27	6.5	R	5
n	2.5	37	27	6.5	R	9
s	1.5	37	27	6.5	R	3
s	2	37	27	6.5	R	3
s	2.5	37	27	6.5	R	5
s	3	37	27	6.5	R	10
d	1.5	37	27	6.5	R	4
d	2	37	27	6.5	R	3
d	2.5	37	27	6.5	R	5
d	3	37	27	6.5	R	9
m	1.5	37	27	6.5	R	2
m	2	37	27	6.5	R	4
m	2.5	37	27	6.5	R	10
o	1.5	37	27	6.5	R	3
o	2	37	27	6.5	R	2
o	2.5	37	27	6.5	R	6
o	3	37	27	6.5	R	10
n	1.2	38	25	6	R	4
n	1.5	38	25	6	R	8
n	2	38	25	6	R	10
s	1.5	38	25	6	R	7
s	2	38	25	6	R	6
s	2.5	38	25	6	R	10
d	1.5	38	25	6	R	4
d	2	38	25	6	R	6
d	2.5	38	25	6	R	10
m	1.5	38	25	6	R	5
m	2	38	25	6	R	6
m	2.5	38	25	6	R	10
o	1.5	38	25	6	R	3
o	2	38	25	6	R	5
o	2.5	38	25	6	R	9
n	1.5	39	24	7	R	5
n	2	39	24	7	R	6
m	2.5	39	24	7	R	10
s	1.5	39	24	7	R	5
s	2	39	24	7	R	9
d	1.5	39	24	7	R	6
d	2	39	24	7	R	9
m	1.5	39	24	7	R	5
m	2	39	24	7	R	9
o	1.5	39	24	7	R	4
o	2	39	24	7	R	5
o	2.5	39	24	7	R	9
n	1.5	40	25	7.5	R	4
n	2	40	25	7.5	R	9
s	1.5	40	25	7.5	R	6
s	2	40	25	7.5	R	6
s	2.5	40	25	7.5	R	9
d	1.5	40	25	7.5	R	6
d	2	40	25	7.5	R	6
d	2.5	40	25	7.5	R	9
m	1.2	40	25	7.5	R	5
m	1.5	40	25	7.5	R	9
o	1.5	40	25	7.5	R	5
o	2	40	25	7.5	R	5
o	2.5	40	25	7.5	R	9
n	1.5	41	25	6.5	R	3
n	2	41	25	6.5	R	4
n	2.5	41	25	6.5	R	6
n	3	41	25	6.5	R	9
s	1.5	41	25	6.5	R	3
s	2	41	25	6.5	R	3
s	2.5	41	25	6.5	R	6
s	3	41	25	6.5	R	10
d	1.5	41	25	6.5	R	6
d	2	41	25	6.5	R	4
d	2.5	41	25	6.5	R	5
d	3	41	25	6.5	R	10
m	1.5	41	25	6.5	R	4
m	2	41	25	6.5	R	4
m	2.5	41	25	6.5	R	3
m	3	41	25	6.5	R	5
m	3.5	41	25	6.5	R	9
o	1.5	41	25	6.5	R	3
o	2	41	25	6.5	R	2
o	2.5	41	25	6.5	R	4
o	3	41	25	6.5	R	7
o	3.5	41	25	6.5	R	10
n	1.2	42	25	7	L	4
n	1.5	42	25	7	L	9
s	1.5	42	25	7	L	5
s	2	42	25	7	L	9
d	1.5	42	25	7	L	5
d	2	42	25	7	L	7
d	2.5	42	25	7	L	9
m	1.2	42	25	7	L	5
m	1.5	42	25	7	L	6
m	2	42	25	7	L	8
o	1.5	42	25	7	L	5
o	2	42	25	7	L	6
o	2.5	42	25	7	L	10
n	1.2	43	25	7	R	4
n	1.5	43	25	7	R	6
n	2	43	25	7	R	8
s	1.5	43	25	7	R	4
s	2	43	25	7	R	5
s	2.5	43	25	7	R	7
s	3	43	25	7	R	9
d	1.5	43	25	7	R	4
d	2	43	25	7	R	6
d	2.5	43	25	7	R	10
m	1.5	43	25	7	R	5
m	2	43	25	7	R	9
o	1.5	43	25	7	R	7
o	2	43	25	7	R	6
o	2.5	43	25	7	R	6
o	3	43	25	7	R	10
n	1.2	44	27	7	R	6
n	1.5	44	27	7	R	9
s	1.5	44	27	7	R	4
s	2	44	27	7	R	6
s	2.5	44	27	7	R	9
d	1.5	44	27	7	R	4
d	2	44	27	7	R	5
d	2.5	44	27	7	R	9
m	1.5	44	27	7	R	5
m	2	44	27	7	R	9
o	1.5	44	27	7	R	3
o	2	44	27	7	R	5
o	2.5	44	27	7	R	10
n	1.2	45	27	7.5	R	5
n	1.5	45	27	7.5	R	9
n	2	45	27	7.5	R	9
s	1.5	45	27	7.5	R	3
s	2	45	27	7.5	R	9
d	1.5	45	27	7.5	R	4
d	2	45	27	7.5	R	5
d	2.5	45	27	7.5	R	7
d	3	45	27	7.5	R	10
m	1.5	45	27	7.5	R	3
m	2	45	27	7.5	R	6
m	2.5	45	27	7.5	R	9
o	1.5	45	27	7.5	R	1
o	2	45	27	7.5	R	4
o	2.5	45	27	7.5	R	4
o	3	45	27	7.5	R	10
n	1.5	46	25	6.5	L	5
n	2	46	25	6.5	L	6
n	2.5	46	25	6.5	L	9
s	1.5	46	25	6.5	L	5
s	2	46	25	6.5	L	7
s	2.5	46	25	6.5	L	9
d	1.5	46	25	6.5	L	4
d	2	46	25	6.5	L	6
d	2.5	46	25	6.5	L	9
m	1.5	46	25	6.5	L	6
m	2	46	25	6.5	L	9
o	1.5	46	25	6.5	L	3
o	2	46	25	6.5	L	6
o	2.5	46	25	6.5	L	9
n	1.2	47	27	7	R	5
n	1.5	47	27	7	R	7
n	2	47	27	7	R	9
s	1.5	47	27	7	R	3
s	2	47	27	7	R	6
s	2.5	47	27	7	R	10
d	1.5	47	27	7	R	5
d	2	47	27	7	R	6
d	2.5	47	27	7	R	6
d	3	47	27	7	R	10
m	1.5	47	27	7	R	4
m	2	47	27	7	R	5
m	2.5	47	27	7	R	5
m	3	47	27	7	R	9
o	1.5	47	27	7	R	4
o	2	47	27	7	R	3
o	2.5	47	27	7	R	5
o	3	47	27	7	R	10
n	1.5	48	28	7.5	R	4
n	2	48	28	7.5	R	5
n	2.5	48	28	7.5	R	5
n	3	48	28	7.5	R	9
s	1.5	48	28	7.5	R	5
s	2	48	28	7.5	R	7
s	2.5	48	28	7.5	R	5
s	3	48	28	7.5	R	6
s	3.5	48	28	7.5	R	9
d	1.5	48	28	7.5	R	2
d	2	48	28	7.5	R	4
d	2.5	48	28	7.5	R	6
d	3	48	28	7.5	R	6
d	3.5	48	28	7.5	R	9
m	1.5	48	28	7.5	R	3
m	2	48	28	7.5	R	5
m	2.5	48	28	7.5	R	7
m	3	48	28	7.5	R	9
o	1.5	48	28	7.5	R	5
o	2	48	28	7.5	R	6
o	2.5	48	28	7.5	R	7
o	3	48	28	7.5	R	9
n	1.5	49	25	6.5	R	4
n	2	49	25	6.5	R	10
s	1.5	49	25	6.5	R	4
s	2	49	25	6.5	R	6
s	2.5	49	25	6.5	R	9
d	1.5	49	25	6.5	R	4
d	2	49	25	6.5	R	4
d	2.5	49	25	6.5	R	6
d	3	49	25	6.5	R	8
d	3.5	49	25	6.5	R	9
m	1.5	49	25	6.5	R	4
m	2	49	25	6.5	R	6
m	2.5	49	25	6.5	R	9
o	1.5	49	25	6.5	R	3
o	2	49	25	6.5	R	2
o	2.5	49	25	6.5	R	6
o	3	49	25	6.5	R	9
n	1.2	50	28	6.5	R	3
n	1.5	50	28	6.5	R	7
n	2	50	28	6.5	R	9
s	1.5	50	28	6.5	R	4
s	2	50	28	6.5	R	5
s	2.5	50	28	6.5	R	8
d	1.5	50	28	6.5	R	4
d	2	50	28	6.5	R	6
d	2.5	50	28	6.5	R	9
m	1.5	50	28	6.5	R	5
m	2	50	28	6.5	R	6
m	2.5	50	28	6.5	R	9
o	1.5	50	28	6.5	R	3
o	2	50	28	6.5	R	4
o	2.5	50	28	6.5	R	7
o	3	50	28	6.5	R	10
n	0.75	51	26	7	R	4
n	1	51	26	7	R	8
n	1.2	51	26	7	R	10
n	1.5	51	26	7	R	10
s	1.5	51	26	7	R	4
s	2	51	26	7	R	7
s	2.5	51	26	7	R	9
d	1.5	51	26	7	R	5
d	2	51	26	7	R	9
d	2.5	51	26	7	R	9
m	1.2	51	26	7	R	5
m	1.5	51	26	7	R	8
o	1.5	51	26	7	R	6
o	2	51	26	7	R	8
n	1.2	52	24	7.5	L	4
n	1.5	52	24	7.5	L	5
n	2	52	24	7.5	L	6
n	2.5	52	24	7.5	L	9
s	1.5	52	24	7.5	L	3
s	2	52	24	7.5	L	3
s	2.5	52	24	7.5	L	4
s	3	52	24	7.5	L	8
d	1.5	52	24	7.5	L	3
d	2	52	24	7.5	L	4
d	2.5	52	24	7.5	L	6
d	3	52	24	7.5	L	10
m	1.5	52	24	7.5	L	3
m	2	52	24	7.5	L	5
m	2.5	52	24	7.5	L	4
m	3	52	24	7.5	L	9
o	1.5	52	24	7.5	L	3
o	2	52	24	7.5	L	4
o	2.5	52	24	7.5	L	4
o	3	52	24	7.5	L	9
n	1.2	53	25	7	R	4
n	1.5	53	25	7	R	7
n	2	53	25	7	R	9
s	1.5	53	25	7	R	6
s	2	53	25	7	R	10
d	1.5	53	25	7	R	4
d	2	53	25	7	R	5
d	2.5	53	25	7	R	10
m	1.2	53	25	7	R	4
m	1.5	53	25	7	R	9
o	1.5	53	25	7	R	6
o	2	53	25	7	R	6
o	2.5	53	25	7	R	8
n	1.2	54	25	7	R	5
n	1.5	54	25	7	R	10
s	1.5	54	25	7	R	3
s	2	54	25	7	R	6
s	2.5	54	25	7	R	9
d	1.5	54	25	7	R	7
d	2	54	25	7	R	7
d	2.5	54	25	7	R	9
m	1.5	54	25	7	R	7
m	2	54	25	7	R	6
m	2.5	54	25	7	R	9
o	1.5	54	25	7	R	6
o	2	54	25	7	R	9
n	1.5	55	25	6.5	R	3
n	2	55	25	6.5	R	5
n	2.5	55	25	6.5	R	9
s	1.5	55	25	6.5	R	5
s	2	55	25	6.5	R	9
d	1.5	55	25	6.5	R	5
d	2	55	25	6.5	R	9
m	1.5	55	25	6.5	R	5
m	2	55	25	6.5	R	9
o	1.5	55	25	6.5	R	4
o	2	55	25	6.5	R	5
o	2.5	55	25	6.5	R	9
n	1.5	56	27	6.5	R	4
n	2	56	27	6.5	R	9
s	1.5	56	27	6.5	R	6
s	2	56	27	6.5	R	6
s	2.5	56	27	6.5	R	10
d	1.5	56	27	6.5	R	6
d	2	56	27	6.5	R	5
d	2.5	56	27	6.5	R	9
m	1.2	56	27	6.5	R	5
m	1.5	56	27	6.5	R	9
o	1.5	56	27	6.5	R	5
o	2	56	27	6.5	R	5
o	2.5	56	27	6.5	R	9
n	1.5	57	26	6	L	4
n	2	57	26	6	L	4
n	2.5	57	26	6	L	7
n	3	57	26	6	L	9
s	1.5	57	26	6	L	2
s	2	57	26	6	L	3
s	2.5	57	26	6	L	5
s	3	57	26	6	L	10
d	1.5	57	26	6	L	4
d	2	57	26	6	L	5
d	2.5	57	26	6	L	5
d	3	57	26	6	L	9
m	1.5	57	26	6	L	4
m	2	57	26	6	L	3
m	2.5	57	26	6	L	4
m	3	57	26	6	L	6
m	3.5	57	26	6	L	9
o	1.5	57	26	6	L	2
o	2	57	26	6	L	4
o	2.5	57	26	6	L	4
o	3	57	26	6	L	7
o	3.5	57	26	6	L	10
n	1.2	58	25	7	R	3
n	1.5	58	25	7	R	5
n	2	58	25	7	R	10
s	1.5	58	25	7	R	5
s	2	58	25	7	R	9
d	1.5	58	25	7	R	5
d	2	58	25	7	R	7
d	2.5	58	25	7	R	10
m	1.5	58	25	7	R	5
m	2	58	25	7	R	5
m	2.5	58	25	7	R	9
o	1.5	58	25	7	R	5
o	2	58	25	7	R	6
o	2.5	58	25	7	R	10
n	1.2	59	25	7	R	4
n	1.5	59	25	7	R	5
n	2	59	25	7	R	9
s	1.5	59	25	7	R	4
s	2	59	25	7	R	5
s	2.5	59	25	7	R	7
s	3	59	25	7	R	10
d	1.5	59	25	7	R	4
d	2	59	25	7	R	6
d	2.5	59	25	7	R	10
m	1.5	59	25	7	R	5
m	2	59	25	7	R	9
o	1.5	59	25	7	R	6
o	2	59	25	7	R	6
o	2.5	59	25	7	R	6
o	3	59	25	7	R	10
n	1.2	60	25	7.5	R	4
n	1.5	60	25	7.5	R	10
s	1.5	60	25	7.5	R	3
s	2	60	25	7.5	R	5
s	2.5	60	25	7.5	R	9
d	1.5	60	25	7.5	R	4
d	2	60	25	7.5	R	5
d	2.5	60	25	7.5	R	8
d	3	60	25	7.5	R	10
m	1.2	60	25	7.5	R	6
m	1.5	60	25	7.5	R	5
m	2	60	25	7.5	R	9
o	1.5	60	25	7.5	R	3
o	2	60	25	7.5	R	5
o	2.5	60	25	7.5	R	10

## Sheet: No Glove
	0.75	1	1.2	1.5	2	2.5	3	3.5	4	4.5		THRESHOLD
1			7	9	9							1.5
2				6	10							2
3			7	8	9							1.5
4				6	9							2
5		4	7	9								1.5
6				6	9							2
7				7	9							2
8				6	7	9						2.5
9		7	9	9	10							1.2
10				6	7	7	9					3
11				5	6	6	9					3
12			6	7	10							2
13				5	6	9						2.5
14				6	7	9						2.5
15				6	6	6	10					3
16				5	5	7	7	9				3.5
17				5	6	9						2.5
18				6	6	8						2.5
19				7	8	9						2
20				5	7	9						2.5
21				6	7	9						2.5
22		4	6	9								1.5
23				5	7	9						2.5
24		6	7	9								1.5
25		5	9	9								1.2
26			6	6	9	9						2
27				5	7	9						2.5
28				4	5	7	9					3
29				5	6	9						2.5
30				6	9							2
31				5	9							2
32				6	6	10						2.5
33				6	6	9						2.5
34			6	9	9							1.5
35				5	9							2
36				4	6	10						2.5
37				2	5	9						2.5
38			4	8	10							2
39				5	6	10						2.5
40				4	9							2
41				3	4	6	9					3
42			4	9								1.5
43			4	6	8							2
44			6	9								1.5
45			5	9	9							1.5
46				5	6	9						2.5
47			5	7	9							2
48				4	5	5	9					3
49				4	10							2
50			3	7	9							2
51	4	8	10	10								1.2
52			4	5	6	9						2.5
53			4	7	9							2
54			5	10								1.5
55				3	5	9						2.5
56				4	9							2
57				4	4	7	9					3
58			3	5	10							2
59			4	5	9							2
60			4	10								1.5
61
62
63
64
65
66
67
68
69
70
71
72
73
74
75
76
77
78
79
80
81
82
83
84
85
86
87
88
89
90
91
92
93
94
95
96
97
98
99
100

## Sheet: Single Standard
	0.75	1	1.2	1.5	2	2.5	3	3.5	4	4.5		THRESHOLD
1				7	9	10						2
2				7	9							2
3				6	9							2
4				7	9							2
5			6	8	8							1.5
6				3	6	8						2.5
7				5	7	9						2.5
8				4	6	10						2.5
9			6	6	8							2
10				5	6	8	9					2.5
11				5	5	7	9					3
12				6	9	10						2
13				4	6	7	9					3
14				5	5	7	9					3
15				3	6	7	9					3
16				4	3	6	9	10				3
17				5	4	7	9					3
18				6	8	8						2
19				3	7	10						2.5
20				5	6	7	8					3
21				5	5	9						2.5
22				5	7	9						2.5
23				4	6	10						2.5
24				6	6	9						2.5
25				6	9							2
26				5	6	9						2.5
27				4	6	10						2.5
28				2	7	6	7	9				3.5
29				3	6	9						2.5
30				4	6	7	9					3
31				5	10							2
32				5	5	7	10					3
33				3	5	6	9					3
34				5	9							2
35				3	4	9						2.5
36				2	4	10						2.5
37				3	3	5	10					3
38				7	6	10						2.5
39				5	9							2
40				6	6	9						2.5
41				3	3	6	10					3
42				5	9							2
43				4	5	7	9					3
44				4	6	9						2.5
45				3	9							2
46				5	7	9						2.5
47				3	6	10						2.5
48				5	7	5	6	9				3.5
49				4	6	9						2.5
50				4	5	8						2.5
51				4	7	9						2.5
52				3	3	4	8					3
53				6	10							2
54				3	6	9						2.5
55				5	9							2
56				6	6	10						2.5
57				2	3	5	10					3
58				5	9							2
59				4	5	7	10					3
60				3	5	9						2.5
61
62
63
64
65
66
67
68
69
70
71
72
73
74
75
76
77
78
79
80
81
82
83
84
85
86
87
88
89
90
91
92
93
94
95
96
97
98
99
100

## Sheet: Double Standard
	0.75	1	1.2	1.5	2	2.5	3	3.5	4	4.5		THRESHOLD
1				7	8	10						2
2				6	9							2
3				4	6	9						2.5
4				7	8	9						2
5				6	6	9						2.5
6				5	7	9	9					2.5
7				7	7	8						2.5
8				5	5	7	10					3
9				7	7	8						2.5
10				5	5	7	7	10				3.5
11				5	3	6	7	9				3.5
12				4	5	8	9					2.5
13				4	6	7	9					3
14				2	5	7	8	10				3
15				3	6	7	9					3
16				1	4	6	7	10				3.5
17				3	2	4	9					3
18				3	5	6	8					3
19				4	5	7	9					3
20				3	6	6	9					3
21				5	7	9						2.5
22				4	7	7	10					3
23				4	6	7	10					3
24				3	6	9						2.5
25				6	6	10						2.5
26				6	6	7	9					3
27				6	6	6	10					3
28				5	4	6	7	9				3.5
29				5	7	9						2.5
30				3	3	5	5	8				3.5
31				4	9							2
32				4	6	9						2.5
33				3	4	3	6	8				3.5
34			5	9	9							1.5
35				4	4	6	9					3
36				3	4	9						2.5
37				4	3	5	9					3
38				4	6	10						2.5
39				6	9							2
40				6	6	9						2.5
41				6	4	5	10					3
42				5	7	9						2.5
43				4	6	10						2.5
44				4	5	9						2.5
45				4	5	7	10					3
46				4	6	9						2.5
47				5	6	6	10					3
48				2	4	6	6	9				3.5
49				4	4	6	8	9				3
50				4	6	9						2.5
51				5	9	9						2
52				3	4	6	10					3
53				4	5	10						2.5
54				7	7	9						2.5
55				5	9							2
56				6	5	9						2.5
57				4	5	5	9					3
58				5	7	10						2.5
59				4	6	10						2.5
60				4	5	8	10					2.5
61
62
63
64
65
66
67
68
69
70
71
72
73
74
75
76
77
78
79
80
81
82
83
84
85
86
87
88
89
90
91
92
93
94
95
96
97
98
99
100

## Sheet: Micro
	0.75	1	1.2	1.5	2	2.5	3	3.5	4	4.5		THRESHOLD
1				7	7	9						2.5
2				7	10							2
3				6	10							2
4				7	9							2
5				7	9							2
6				6	7	7	9					3
7				6	8							2
8				6	6	8	9					2.5
9			5	7	10							2
10				5	6	7	7	8				3.5
11				4	5	7	9	9				3
12			6	8	9							1.5
13				4	4	7	9					3
14				3	5	7	7	10				3.5
15				6	5	6	7	10				3.5
16				4	3	6	7	10				3.5
17				3	4	6	10					3
18				6	7	9						2.5
19				4	7	9						2.5
20				6	5	6	10					3
21				5	5	10						2.5
22				5	9							2
23				5	8	9						2
24				3	6	7	10					3
25				4	6	6	10					3
26				6	7	10						2.5
27				4	5	5	9					3
28				6	7	10						2.5
29				4	6	9						2.5
30				5	6	8						2.5
31				6	9							2
32				4	6	10						2.5
33				6	5	8						2.5
34			5	8	9							1.5
35				4	5	10						2.5
36				5	9	10						2
37				2	4	10						2.5
38				5	6	10						2.5
39				5	9							2
40			5	9								1.5
41				4	4	3	5	9				3.5
42			5	6	8							2
43				5	9							2
44				5	9							2
45				3	6	9						2.5
46				6	9							2
47				4	5	5	9					3
48				3	5	7	9					3
49				4	6	9						2.5
50				5	6	9						2.5
51			5	8								1.5
52				3	5	4	9					3
53			4	9								1.5
54				7	6	9						2.5
55				5	9							2
56			5	9								1.5
57				4	3	4	6	9				3.5
58				5	5	9						2.5
59				5	9							2
60			6	5	9							2
61
62
63
64
65
66
67
68
69
70
71
72
73
74
75
76
77
78
79
80
81
82
83
84
85
86
87
88
89
90
91
92
93
94
95
96
97
98
99
100

## Sheet: Orthopedic
	0.75	1	1.2	1.5	2	2.5	3	3.5	4	4.5		THRESHOLD
1				6	7	9	10					2.5
2				6	7	9						2.5
3				6	6	9						2.5
4				7	8	9						2
5				6	8	9						2
6				5	6	8	9					2.5
7				4	6	7	9					3
8				4	7	9						2.5
9				6	7	8						2.5
10				3	6	7	8	9				3
11				4	6	7	7	9				3.5
12				5	6	6	9					3
13				5	5	9	10					2.5
14				5	5	6	10					3
15				6	6	7	10					3
16				5	4	5	7	7	10			4
17				7	4	7	7	10				3.5
18				5	7	7	9					3
19				4	6	7	9					3
20				6	6	7	9					3
21				6	6	9						2.5
22				7	6	9						2.5
23				5	6	7	9					3
24				4	6	6	7	9				3.5
25				3	6	9						2.5
26				4	4	7	9					3
27				3	3	5	10					3
28				5	6	7	9					3
29				4	6	9						2.5
30				2	3	4	4	9				3.5
31				5	6	9						2.5
32				4	4	7	10					3
33				5	5	7	9					3
34				7	9							2
35				5	4	5	8					3
36				5	5	9						2.5
37				3	2	6	10					3
38				3	5	9						2.5
39				4	5	9						2.5
40				5	5	9						2.5
41				3	2	4	7	10				3.5
42				5	6	10						2.5
43				7	6	6	10					3
44				3	5	10						2.5
45				1	4	4	10					3
46				3	5	9						2.5
47				4	3	5	10					3
48				5	6	7	9					3
49				3	2	6	9					3
50				3	4	7	10					3
51				6	8							2
52				3	4	4	9					3
53				6	6	8						2.5
54				6	9							2
55				4	5	9						2.5
56				5	5	9						2.5
57				2	4	4	7	10				3.5
58				5	6	10						2.5
59				6	6	6	10					3
60				3	5	10						2.5
61
62
63
64
65
66
67
68
69
70
71
72
73
74
75
76
77
78
79
80
81
82
83
84
85
86
87
88
89
90
91
92
93
94
95
96
97
98
99
100
